# Supplementary material for: Functional and structural insights into the MRX/MRN complex, a key player in recognition and repair of DNA double-strand breaks
Source: PubMed Central journal article supplement (PMC7260605; doi:10.1016/j.csbj.2020.05.013), 2020-05-16
Supplement: mmc1.pdf [file mmc1.pdf]

## Supplementary Information

**Table S1. Mutations cited in the text.**

| Allele          | Mutation        | Protein | Organism             | Phenotype                                                 | Ref. |
|-----------------|-----------------|---------|----------------------|-----------------------------------------------------------|------|
| <i>rad50-48</i> | S679R,<br>P682R | Rad50   | <i>H. sapiens</i>    | defect in Rad50 dimerization                              | [1]  |
|                 | R805E           | Rad50   | <i>P. furiosus</i>   | slow ATP hydrolysis                                       | [2]  |
|                 | L828F           | Rad50   | <i>P. furiosus</i>   | defect in ATM activation                                  | [3]  |
|                 | D829N           | Rad50   | <i>P. furiosus</i>   | defect in ATM activation                                  | [3]  |
|                 | A78T            | Rad50   | <i>S. cerevisiae</i> | defect in Tel1 activation                                 | [4]  |
|                 | E115K           | Rad50   | <i>E. coli</i>       | reduced endo/exonuclease and altered DNA binding activity | [5]  |
| <i>rad50S</i>   | K6E             | Rad50   | <i>S. cerevisiae</i> | defective in removing Spo11 from DSB end                  | [6]  |
| <i>rad50S</i>   | R20M            | Rad50   | <i>S. cerevisiae</i> | defective in removing Spo11 from DSB end                  | [6]  |
| <i>rad50S</i>   | K81I            | Rad50   | <i>S. cerevisiae</i> | defective in removing Spo11 from DSB end                  | [6]  |
|                 | Y328A           | Mre11   | <i>S. cerevisiae</i> | DNA damage sensitivity                                    | [7]  |
|                 | N113S           | Mre11   | <i>S. pombe</i>      | defective Mre11 interaction with Nbs1                     | [8]  |
|                 | S499P           | Mre11   | <i>S. cerevisiae</i> | defective Mre11-Rad50 interaction                         | [4]  |
|                 | K149E           | Mre11   | <i>E. coli</i>       | reduced endo/exonuclease and altered DNA binding activity | [5]  |
| <i>mre11S</i>   | T188I           | Mre11   | <i>S. cerevisiae</i> | defective Spo11 removal from DSB end                      | [9]  |
|                 | R184A           | Mre11   | <i>S. cerevisiae</i> | DNA damage sensitive in <i>sgs1Δ</i> background           | [10] |
|                 | H125N           | Mre11   | <i>S. cerevisiae</i> | nuclease deficient                                        | [11] |
|                 | H52S            | Mre11   | <i>P. furiosus</i>   | loss of exonuclease activity                              | [12] |
|                 | Y187C           | Mre11   | <i>P. furiosus</i>   | loss of exonuclease activity                              | [13] |
|                 | R10T            | Mre11   | <i>S. cerevisiae</i> | <i>sae2Δ</i> DNA damage and resection defect rescue       | [14] |



C

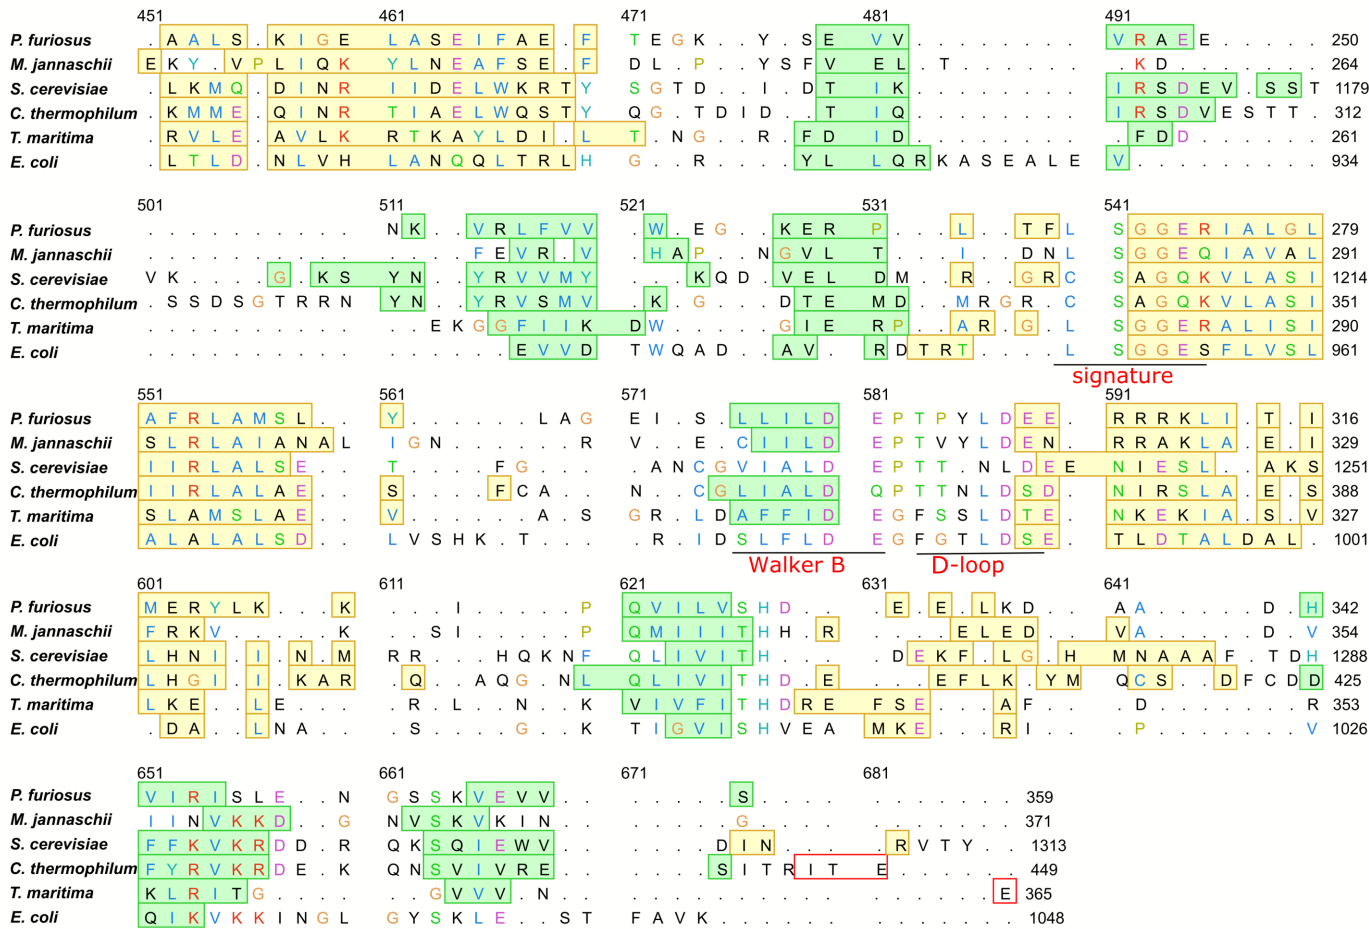



## B - continued

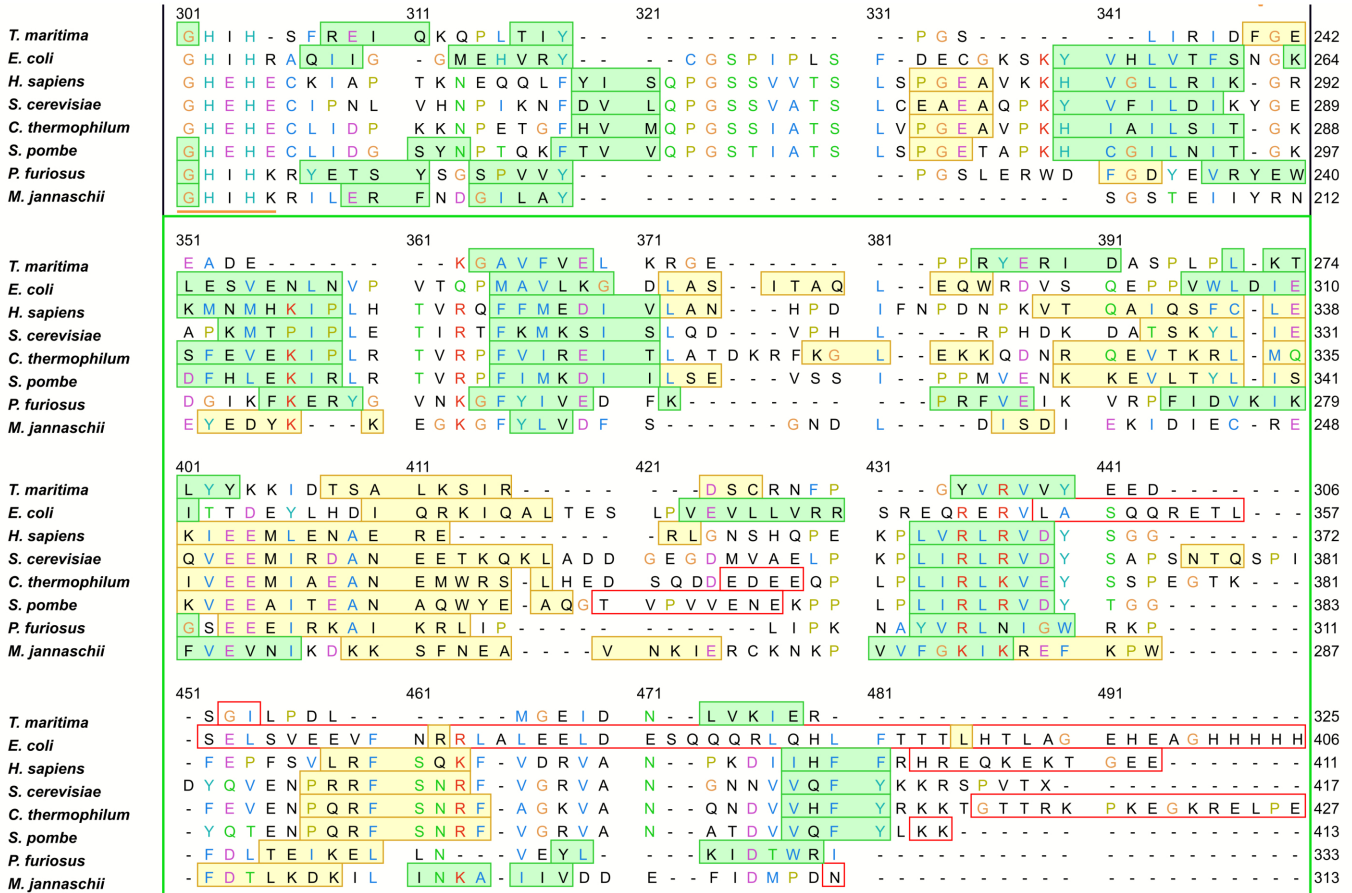

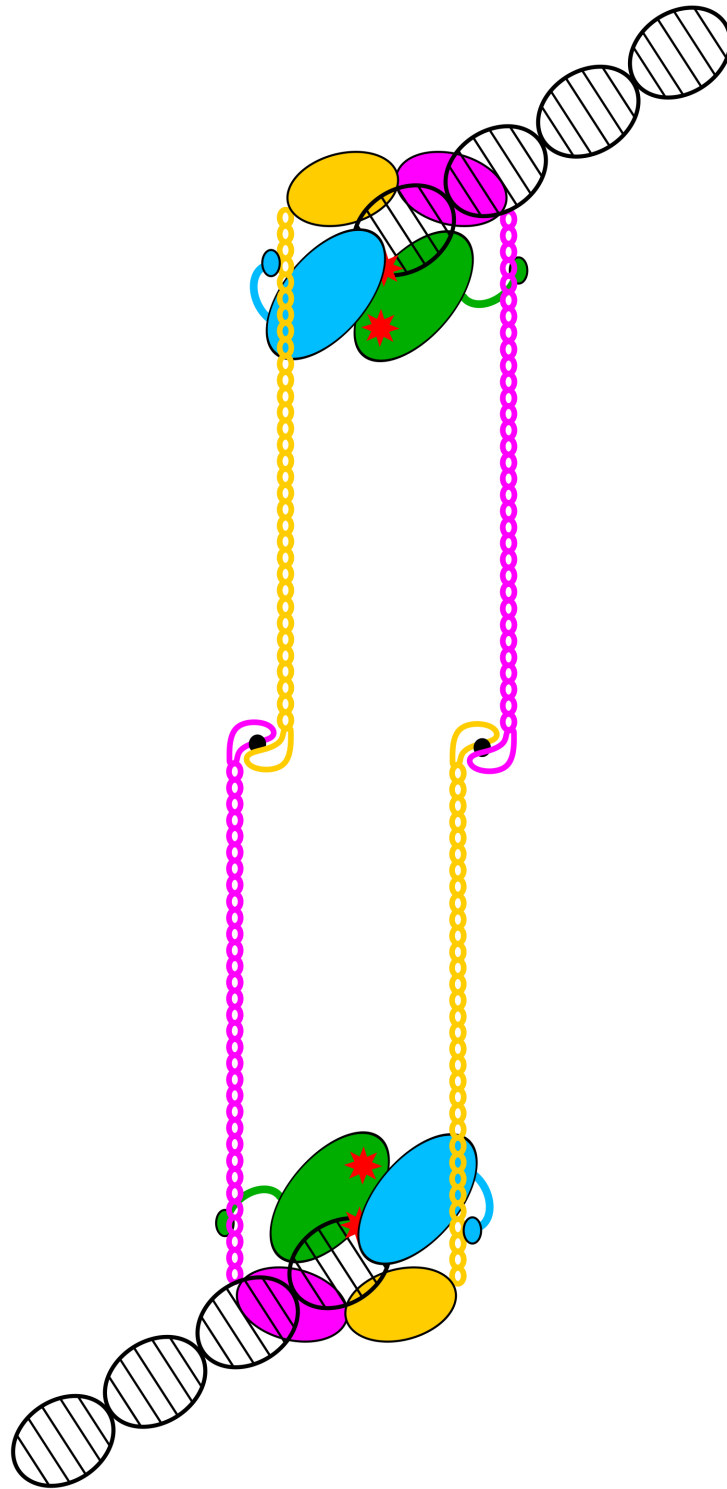

## Supplementary figure legends

**Supplementary Figure S1.** Structural features and structural alignment of Rad50 orthologs. (A) Scheme depicting the conserved domains present in Rad50 orthologues from the indicated organisms. (B,C) Structural alignment of the lobe I (B) and lobe II (C) of Rad50 orthologues from eubacteria *T. maritima* (PDB ID: 4W9M) and *E. coli* (PDB ID: 6S6V), eukaryotes *S. cerevisiae* (model from reference [4]) and *C. thermophilum* (PDB ID:5DAC), and archaea *P. furiosus* (PDB ID:3QKU) and *M. jannaschii* (PDB ID:3AV0). Secondary structures are indicated, wherever the structure is available (otherwise the sequence is marked by a red rectangle), as follows: solid yellow rectangles, alpha helix; solid green rectangles, beta sheets. Alignment residues coloring is according to ClustalW style. Conserved functionally relevant motifs are underlined and labelled.

**Supplementary Figure S2.** Structural features and structural alignment of Mre11 orthologs. A. Scheme depicting the conserved domains present in Mre11 orthologs from the indicated organisms. (B) Structural alignment of the N-terminal regions of Mre11 orthologues from eubacteria *T. maritima* (PDB ID: 4NZV) and *E. coli* (PDB ID: 6S6V), eukaryotes *S. cerevisiae* (model from reference [15]), *H. sapiens* (PDB ID:3T1I), *C. thermophilum* (PDB ID:4KYE), and *S. pombe* (PDB ID:4FCX), and archaea *P. furiosus* (PDB ID:1II7) and *M. jannaschii* (PDB ID:3AV0). Secondary structures are indicated, wherever the structure is available (otherwise the sequence is marked by a red rectangle), as follows: solid yellow rectangles, alpha helix; solid green rectangles, beta sheets. Alignment residues coloring is according to ClustalW style. Functional regions of the proteins are indicated by open boxes: black box, endonuclease domain; green box, capping domain; purple box, latching loop; blue box, fastener loop. Orange bars highlight conserved phosphoesterase signature motifs (I to V). Green triangles indicate the residues identified for Nbs1 binding in *S. pombe* [8].

**Supplementary Figure S3.** DNA tethering can be achieved by bridging the DSB ends through an intercomplex dimerization at the Zn-hook interface of two distinct MR complexes.

## References

- [1] Park YB, Hohl M, Padjasek M, Jeong E, Jin KS, Kręzel A, et al. Eukaryotic Rad50 functions as a rod-shaped dimer. *Nat Struct Mol Biol* 2017;24:248–57. <https://doi.org/10.1038/nsmb.3369>.
- [2] Deshpande RA, Williams GJ, Limbo O, Williams RS, Kuhnlein J, Lee J-H, et al. ATP-driven Rad50 conformations regulate DNA tethering, end resection, and ATM checkpoint signaling. *EMBO J* 2014;33:482–500. <https://doi.org/10.1002/embj.201386100>.
- [3] Boswell ZK, Canny MD, Buschmann TA, Sang J, Latham MP. Adjacent mutations in the archaeal Rad50 ABC ATPase D-loop disrupt allosteric regulation of ATP hydrolysis through different mechanisms. *Nucleic Acids Res* 2020;48:2457–72. <https://doi.org/10.1093/nar/gkz1228>.
- [4] Cassani C, Vertemara J, Bassani M, Marsella A, Tisi R, Zampella G, et al. The ATP-bound conformation of the Mre11-Rad50 complex is essential for Tel1/ATM activation. *Nucleic Acids Res* 2019;47:3550–67. <https://doi.org/10.1093/nar/gkz038>.
- [5] Käshammer L, Saathoff JH, Lammens K, Gut F, Bartho J, Alt A, et al. Mechanism of DNA end sensing and processing by the Mre11-Rad50 complex. *Mol Cell* 2019;76:382-394.e6. <https://doi.org/10.1016/j.molcel.2019.07.035>.
- [6] Alani E, Padmore R, Kleckner N. Analysis of wild-type and *rad50* mutants of yeast suggests an intimate relationship between meiotic chromosome synapsis and recombination. *Cell* 1990;61:419–36. [https://doi.org/10.1016/0092-8674\(90\)90524-I](https://doi.org/10.1016/0092-8674(90)90524-I).
- [7] Lammens K, Bemeleit DJ, Möckel C, Clausing E, Schele A, Hartung S, et al. The Mre11:Rad50 structure shows an ATP-dependent molecular clamp in DNA double-strand break repair. *Cell* 2011;145:54–66. <https://doi.org/10.1016/j.cell.2011.02.038>.
- [8] Schiller CB, Lammens K, Guerini I, Coordes B, Feldmann H, Schlauderer F, Möckel C, Schele A, Strässer K, Jackson SP, Hopfner KP. Structure of Mre11-Nbs1 complex yields insights into ataxia-telangiectasia-like disease mutations and DNA damage signaling. *Nat Struct Mol Biol*. 2012;19:693-700. <https://doi.org/10.1038/nsmb.2323>
- [9] Nairz K, Klein F. *mre11S* - A yeast mutation that blocks double-strand-break processing and permits nonhomologous synapsis in meiosis. *Genes Dev* 1997;11:2272–90. <https://doi.org/10.1101/gad.11.17.2272>.
- [10] Sung S, Li F, Park YB, Kim JS, Kim A, Song O, et al. DNA end recognition by the Mre11 nuclease dimer: insights into resection and repair of damaged DNA. *EMBO J* 2014;33:2422–2435. <https://doi.org/10.15252/embj.201488299>.
- [11] Moreau S, Ferguson JR, Symington LS. The nuclease activity of Mre11 is required for



meiosis but not for mating type switching, end joining, or telomere maintenance. *Mol and Cell Biol* 1999; 19:556-566. <https://doi.org/10.1128/MCB.19.1.556>.

- [12] Williams RS, Moncalian G, Williams JS, Yamada Y, Limbo O, Shin DS, et al. Mre11 dimers coordinate DNA end bridging and nuclease processing in double-strand-break repair. *Cell* 2008;135:97–109. <https://doi.org/10.1016/j.cell.2008.08.017>.
- [13] Hopfner KP, Karcher A, Craig L, Woo TT, Carney JP, Tainer JA. Structural biochemistry and interaction architecture of the DNA double-strand break repair Mre11 nuclease and Rad50-ATPase. *Cell* 2001;105:473–85. [https://doi.org/10.1016/S0092-8674\(01\)00335-X](https://doi.org/10.1016/S0092-8674(01)00335-X).
- [14] Gobbini E, Vertemara J, Longhese MP. Local unwinding of double-strand DNA ends by the MRX complex promotes Exo1 processing activity. *Mol Cell Oncol* 2018;5. <https://doi.org/10.1080/23723556.2018.1511208>.
- [15] Cassani C, Gobbini E, Vertemara J, Wang W, Marsella A, Sung P, et al. Structurally distinct Mre11 domains mediate MRX functions in resection, end-tethering and DNA damage resistance. *Nucleic Acids Res* 2018;46. <https://doi.org/10.1093/nar/gky086>.
